# Supplementary material for: Circulating miRNA-192 and miR-29a as Disease Progression Biomarkers in Hepatitis C Patients with a Prevalence of HCV Genotype 3
Source: MDPI journal article supplement (doi:10.3390/genes14051056), 2023-05-08
Supplement: s1 [file s1]

**Supplementary Table S1A.** The demographic and clinical features of the enrolled patients (n=222).

| No. of Variables             | No. of Values     |
|------------------------------|-------------------|
| <b>Gender</b>                |                   |
| Gender                       | Frequency         |
| Male                         | 61%               |
| Female                       | 39%               |
| <b>Age, years</b>            |                   |
| Age                          | Frequency         |
| <30                          | 15                |
| 31-50                        | 112               |
| 51-70                        | 90                |
| >70                          | 05                |
| Average                      | 49.03             |
| Range-years $\pm$ SD         | 19-91 $\pm$ 12.65 |
| <b>Healthy control (52)</b>  |                   |
| Gender                       | Frequency         |
| Male                         | 28 (54%)          |
| Female                       | 24 (46%)          |
| Average age                  | 40                |
| Mean $\pm$ SD- years         | 40 $\pm$ 12.20    |
| <b>Age, years</b>            |                   |
| <30                          | 15(29%)           |
| 31-50                        | 26(50%)           |
| 51-70                        | 10(19%)           |
| >70                          | 1(2%)             |
| <b>HCV infected patients</b> |                   |
| Mild (n)                     | 37                |
| mean $\pm$ SD years          | 50.56 $\pm$ 13.19 |
| mode                         | 50                |
| Moderate (n)                 | 87                |
| mean $\pm$ SD years          | 47.18 $\pm$ 12.25 |
| Mode                         | 55                |
| Severe (n)                   | 98                |
| mean $\pm$ (SD years         | 48.0 $\pm$ 11.94  |
| mode                         | 50                |

| Child Turcotte Pugh Score |                |       |
|---------------------------|----------------|-------|
| Child score A (5-6)       | 17%            |       |
| Child score A (7-9)       | 39%            |       |
| Child score A (10-15)     | 44%            |       |
| Ascites                   |                |       |
| Male                      | High           | 38.2% |
|                           | Moderate       | 16.9% |
|                           | Less           | 4.5%  |
| Female                    | High           | 20.6% |
|                           | Moderate       | 13.5% |
|                           | Less           | 6.4%  |
| Blood pressure            |                |       |
| Male                      | Normal         | 18%   |
|                           | High           | 15.4% |
|                           | Low            | 26.2% |
| Female                    | Normal         | 15%   |
|                           | High           | 10.9% |
|                           | Low            | 14.6% |
| Size of spleen            |                |       |
| Male                      | Normal         | 21%   |
|                           | Enlarged       | 38.6% |
| Female                    | Normal         | 15%   |
|                           | Enlarged       | 25.5% |
| GIT                       |                |       |
| Male                      | Normal         | 4%    |
|                           | Tenderness     | 21.3% |
|                           | Non-tenderness | 37.8% |
| Female                    | Normal         | 7%    |
|                           | Tenderness     | 12%   |
|                           | Non-tenderness | 27.7% |
| Viral load (Iu/ml)        |                |       |
| <10,00000                 | 49.4%          |       |
| 10,00000 -50,00000        | 26.21%         |       |
| >50,00000                 | 24.34%         |       |

**Abbreviation: GIT;** gastro-intestinal tract.

**Supplementary Table S1B.** LFTs, Genotypes, Risk factors of chronic HCV Patients.

| ALT/AST                    |                      |       |
|----------------------------|----------------------|-------|
| Average –Median            | 121.46 – 121         |       |
| Mode                       | 139                  |       |
| Range ± Standard deviation | 64-186 ± 29.23       |       |
| AFP                        |                      |       |
| <40 ng/mL                  | 33%                  |       |
| 41-150 ng/mL               | 47%                  |       |
| >151 ng/mL                 | 30%                  |       |
| Mean                       | 43.09                |       |
| Range ± Standard deviation | 16-301±28.08         |       |
| Albumin                    |                      |       |
| Male                       | Normal (3-5 g/dL)    | 15.7% |
|                            | Abnormal (<3-5 g/dL) | 24.7% |
| Female                     | Normal (3-5 g/dL)    | 19.1% |
|                            | Abnormal (<3-5 g/dL) | 40.4% |
| Risk factors               |                      |       |
| Dentist                    | 33.08%               |       |
| Unknown source             | 28.95%               |       |
| Surgery                    | 10.86%               |       |
| HCV in family              | 23.97%               |       |
| Blood Transfusion          | 4.11%                |       |
| Genotypes                  |                      |       |
| Genotype 1                 | 11(5)                |       |
| Genotype 2                 | 23(10.4)             |       |
| Genotype 3                 | 137(61.7)            |       |
| Mixed                      | 9(4.1)               |       |
| Untyped                    | 42(18.9)             |       |
| Viral load (Iu/ml)         |                      |       |
| <10,00000                  | 49.4%                |       |
| 10,00000 -50,00000         | 26.21%               |       |
| >50,00000                  | 24.34%               |       |

**Abbreviation:** ALT; alanine aminotransferase. AST; aspartate aminotransferase. AFP; alpha fetoprotein. ALP; alkaline phosphatase

**Supplementary Table S1C.** List of healthy control (n=52) used in the HCV study.

| S.No | Age | Gender | Area     |
|------|-----|--------|----------|
| 1    | 50  | F      | Peshawar |
| 2    | 48  | M      | Charsada |
| 3    | 30  | F      | Peshawar |
| 4    | 33  | M      | Peshawar |
| 5    | 43  | M      | Peshawar |
| 6    | 33  | F      | Peshawar |
| 7    | 35  | F      | Mardan   |
| 8    | 60  | M      | Peshawar |
| 9    | 40  | F      | Peshawar |
| 10   | 55  | M      | Peshawar |
| 11   | 65  | M      | Peshawar |
| 12   | 48  | M      | Charsada |
| 13   | 30  | F      | Peshawar |
| 14   | 29  | F      | Mardan   |
| 15   | 50  | M      | Peshawar |
| 16   | 50  | M      | Peshawar |
| 17   | 40  | F      | Peshawar |
| 18   | 35  | F      | Mardan   |
| 19   | 61  | M      | Peshawar |
| 20   | 28  | F      | Peshawar |
| 21   | 25  | M      | Peshawar |
| 22   | 39  | F      | Peshawar |
| 23   | 44  | M      | Peshawar |
| 24   | 25  | F      | Peshawar |
| 25   | 50  | M      | Peshawar |
| 26   | 45  | M      | Peshawar |
| 27   | 30  | M      | Charsada |
| 28   | 79  | F      | Peshawar |
| 29   | 40  | M      | Mardan   |
| 30   | 49  | M      | Peshawar |
| 31   | 30  | M      | Peshawar |
| 32   | 62  | M      | Peshawar |
| 33   | 30  | F      | Peshawar |
| 34   | 45  | F      | Malakand |
| 35   | 45  | M      | Peshawar |
| 36   | 36  | M      | Peshawar |
| 37   | 40  | F      | Peshawar |
| 38   | 44  | M      | Mardan   |
| 39   | 52  | F      | Mardan   |

|    |    |   |          |
|----|----|---|----------|
| 40 | 30 | F | Swabi    |
| 41 | 40 | M | Peshawar |
| 42 | 40 | F | Mardan   |
| 43 | 52 | M | Charsada |
| 44 | 50 | F | Charsada |
| 45 | 23 | F | Peshawar |
| 46 | 22 | M | Mardan   |
| 47 | 40 | F | Peshawar |
| 48 | 39 | M | Kohat    |
| 49 | 23 | F | Mardan   |
| 50 | 20 | F | Peshawar |
| 51 | 45 | M | Kohat    |
| 52 | 27 | M | Peshawar |

**Supplementary Table S2.** MicroRNA- 192 performance in HCV patient.

| Parameters        | Area under the ROC curve | 95% confidence interval | Std. Error | P value  |
|-------------------|--------------------------|-------------------------|------------|----------|
| Control- Mild     | 0.7625                   | 0.6331 to 0.8919        | 0.06601    | < 0.0005 |
| Control- Moderate | 0.6590                   | 0.5601 to 0.7579        | 0.05046    | < 0.0028 |
| Control- Severe   | 0.7076                   | 0.6209 to 0.7942        | 0.04420    | < 0.0001 |
| Mild- Moderate    | 0.6123                   | 0.4705 to 0.7541        | 0.07231    | 0.1320   |
| Mild- Severe      | 0.7625                   | 0.6331 to 0.8919        | 0.06601    | < 0.0005 |
| Moderate- Severe  | 0.5555                   | 0.4624 to 0.6485        | 0.04747    | 0.2405   |

**Supplementary Table S3.** MicroRNA- 29a diagnostic performance in HCV patient.

| Parameters        | Area under the ROC curve | 95% confidence interval | Std. Error | P value  |
|-------------------|--------------------------|-------------------------|------------|----------|
| Control- Mild     | 0.8349                   | 0.7181 to 0.9517        | 0.05958    | < 0.0010 |
| Control- Moderate | 0.8588                   | 0.7791 to 0.9386        | 0.04067    | < 0.0001 |
| Control- Severe   | 0.7862                   | 0.6834 to 0.8889        | 0.05241    | < 0.0001 |
| Mild- Moderate    | 0.6081                   | 0.4264 to 0.7899        | 0.09271    | 0.2905   |
| Mild- Severe      | 0.8349                   | 0.7181 to 0.9517        | 0.05958    | 0.05958  |
| Moderate- Severe  | 0.7462                   | 0.6308 to 0.8616        | 0.05886    | 0.00010  |

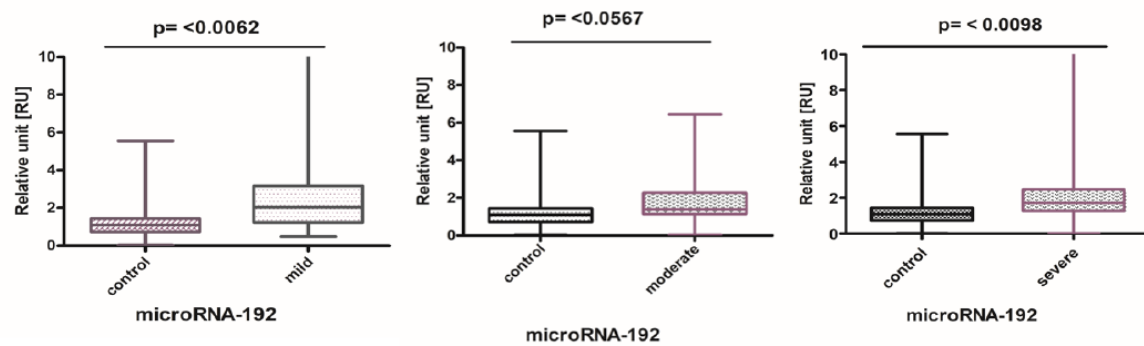

Figure S1. microRNA-192.

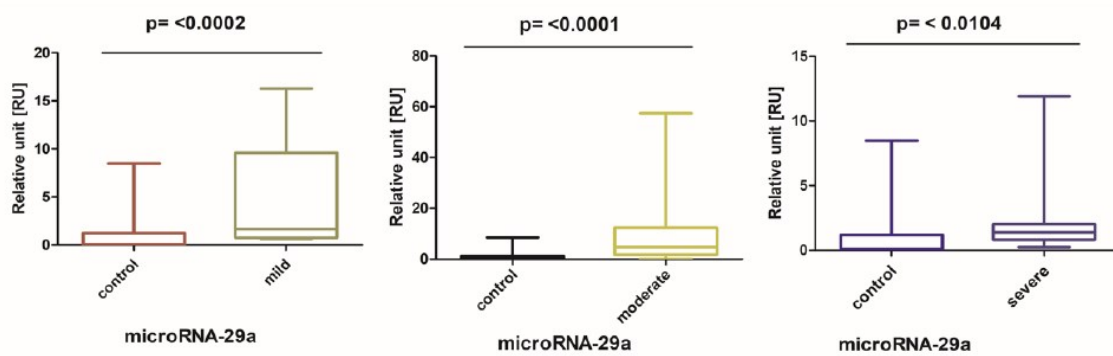

Figure S2. microRNA-29a.

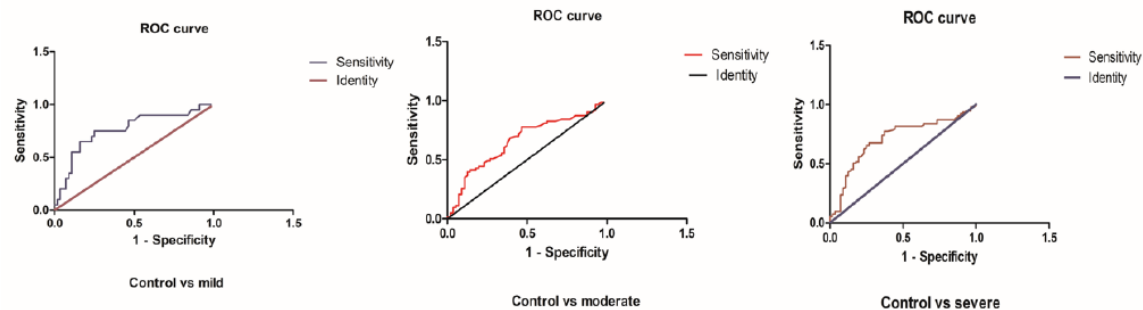

ROC-192

Figure S3. ROC-192.

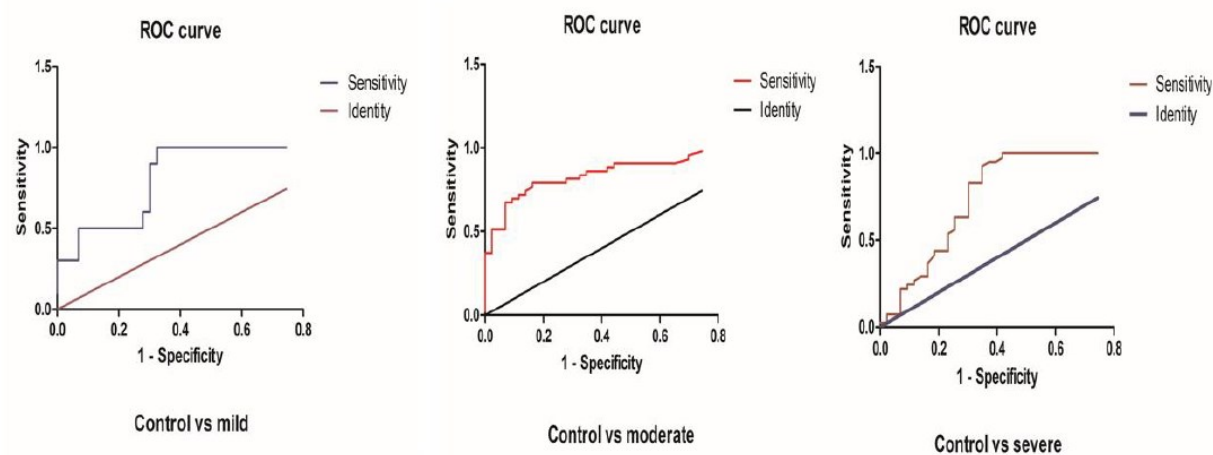

Figure S4. ROC-29a
